# Supplementary material
Source: PubMed Central journal article supplement (PMC6309670)
Supplement: NIHMS985058-supplement-1.pdf [file NIHMS985058-supplement-1.pdf]

**Supplemental Table 1: Multivariable analysis of outcomes after accelerated compared to standard infliximab induction for acute severe ulcerative colitis, stratified by study site**

| <u>Colectomy time point</u>                              | <u>Odds Ratio</u>  | <u>95% confidence interval</u> |
|----------------------------------------------------------|--------------------|--------------------------------|
| <b><u>Study site: Massachusetts General Hospital</u></b> |                    |                                |
| <b><u>In-hospital</u></b>                                | <b><u>3.30</u></b> | <b><u>0.37 – 29.35</u></b>     |
| <b><u>3 months</u></b>                                   | <b><u>2.27</u></b> | <b><u>0.71 – 7.23</u></b>      |
| <b><u>6 months</u></b>                                   | <b><u>2.35</u></b> | <b><u>0.78 – 7.10</u></b>      |
| <b><u>12 months</u></b>                                  | <b><u>1.84</u></b> | <b><u>0.69 – 4.93</u></b>      |
| <b><u>24 months</u></b>                                  | <b><u>1.74</u></b> | <b><u>0.67 – 4.53</u></b>      |
| <b><u>Study site: Indiana University</u></b>             |                    |                                |
| <b><u>In-hospital</u></b>                                | <b><u>N/A†</u></b> |                                |
| <b><u>3 months</u></b>                                   | <b><u>N/A†</u></b> |                                |
| <b><u>6 months</u></b>                                   | <b><u>1.00</u></b> | <b><u>0.18 – 5.52</u></b>      |
| <b><u>12 months</u></b>                                  | <b><u>0.45</u></b> | <b><u>0.08 – 2.61</u></b>      |
| <b><u>24 months</u></b>                                  | <b><u>0.36</u></b> | <b><u>0.06 – 1.97</u></b>      |
| <b><u>Study site: Johns Hopkins Hospital</u></b>         |                    |                                |
| <b><u>In-hospital</u></b>                                | <b><u>0.37</u></b> | <b><u>0.03 – 4.09</u></b>      |
| <b><u>3 months</u></b>                                   | <b><u>0.45</u></b> | <b><u>0.07 – 2.73</u></b>      |
| <b><u>6 months</u></b>                                   | <b><u>0.35</u></b> | <b><u>0.06 – 2.13</u></b>      |
| <b><u>12 months</u></b>                                  | <b><u>0.27</u></b> | <b><u>0.05 – 1.63</u></b>      |
| <b><u>24 months</u></b>                                  | <b><u>0.28</u></b> | <b><u>0.05 – 1.71</u></b>      |

**† - Odds ratios could not be calculated as there was no colectomy in the accelerated infliximab group in-hospital or at 3 months at this site.**

**Supplemental Table 2: Multivariable comparison of outcomes of up front dosing of 10mg/kg infliximab to standard induction therapy for acute severe ulcerative colitis**

| Colectomy time point | Odds Ratio | 95% confidence interval | p-value |
|----------------------|------------|-------------------------|---------|
| In-hospital          | 0.54       | 0.09 – 3.09             | 0.49    |
| 3 months             | 1.02       | 0.34 – 3.05             | 0.97    |
| 6 months             | 0.88       | 0.33 – 2.32             | 0.80    |
| 12 months            | 0.54       | 0.21 – 1.37             | 0.20    |
| 24 months            | 0.44       | 0.18 – 1.12             | 0.08    |
